# Supplementary material for: Dairy Propionibacterium extends the mean lifespan of Caenorhabditis elegans via activation of the innate immune system
Source: PubMed Central journal article supplement (PMC4987649; doi:10.1038/srep31713), 2016-08-17
Supplement: srep31713-s1.pdf [file srep31713-s1.pdf]

**Supplementary Information**

**Dairy *Propionibacterium* extends the mean lifespan of *Caenorhabditis elegans* via activation of the innate immune system**

**Gayeung Kwon, Jiyun Lee, Young-Hee Lim**

**Table S1. Primer sequences used in this study.**

| Gene          |         | Primer sequence            | Product size (bp) |
|---------------|---------|----------------------------|-------------------|
| <i>act-1</i>  | Forward | 5' CACGGTATCGTCACCAACTG 3' | 122               |
|               | Reverse | 5' GCTTCAGTGAGGAGGACTGG 3' |                   |
| <i>daf-2</i>  | Forward | 5' GCCCGAATGTTGTGAAAAC 3'  | 185               |
|               | Reverse | 5' CCAGTGCTTCTGAATCGTCA 3' |                   |
| <i>daf-16</i> | Forward | 5' TCCTCATTCACTCCCGATT 3'  | 175               |
|               | Reverse | 5' CCGGTATATTCATGAACGTG 3' |                   |
| <i>pmk-1</i>  | Forward | 5' ACTCGCCGTGATTTCAAACG 3' | 100               |
|               | Reverse | 5' CAGTTGGACGACGATCTGGA 3' |                   |
| <i>sek-1</i>  | Forward | 5' TGGCAAACACATTCCAGAGC 3' | 196               |
|               | Reverse | 5' AGTCTTGGCCATGCTGTTTG 3' |                   |
| <i>mek-1</i>  | Forward | 5' GCCTCATCATCCATCCCGTA 3' | 135               |
|               | Reverse | 5' TCCACGAACTGAAGCTCCTT 3' |                   |
| <i>dbl-1</i>  | Forward | 5' GCCATTCTCCACCTCTTCCT 3' | 149               |
|               | Reverse | 5' GGAACATCAATGCTCGGACC 3' |                   |
| <i>daf-7</i>  | Forward | 5' GTGCTGCTTGTATGACCTCG 3' | 136               |
|               | Reverse | 5' GGTTTCCGCCAAGTTGAAGT 3' |                   |
| <i>lys-7</i>  | Forward | 5' ATTCAGGTCACTTCGCCAAC 3' | 148               |
|               | Reverse | 5' ATCCGGTTCGTGATCTGATT 3' |                   |
| <i>lys-8</i>  | Forward | 5' CTCCACGAGTTCCACCAAAT 3' | 124               |
|               | Reverse | 5' TATGCACGGACAAAGACTGC 3' |                   |
| <i>sma-3</i>  | Forward | 5' CCACCGCACAGTCAATTATG 3' | 144               |
|               | Reverse | 5' ATCTTCTCCCCAGCCCTTTA 3' |                   |
| <i>daf-12</i> | Forward | 5' GTTCTGGTGAAGCCGAAGAG 3' | 178               |
|               | Reverse | 5' AAGGGTGGTTGAGGTACGTG 3' |                   |
| <i>skn-1</i>  | Forward | 5' TCAGGACGTCAACAGCAGAC 3' | 164               |
|               | Reverse | 5' CGTGGAGATTCCGAAGAGAG 3' |                   |

**A**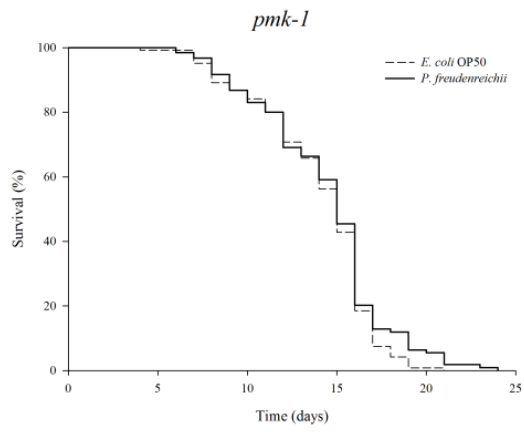**B**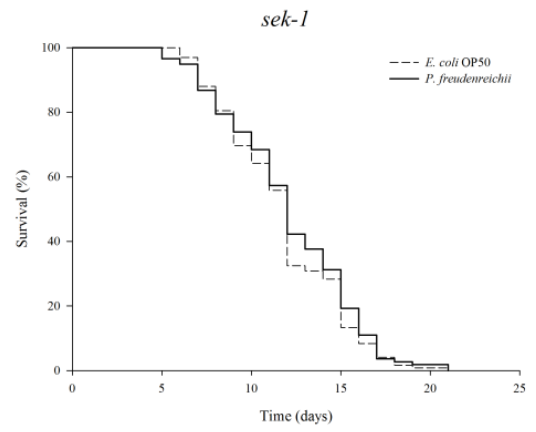**C**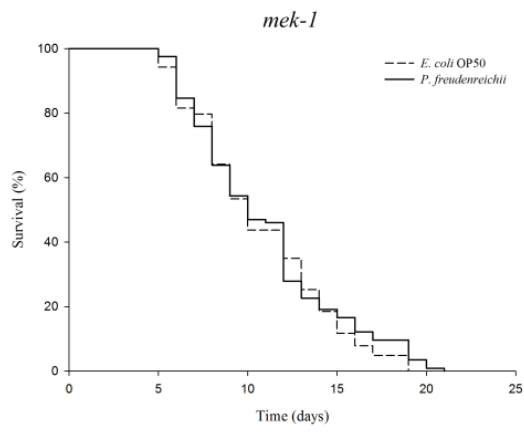**D**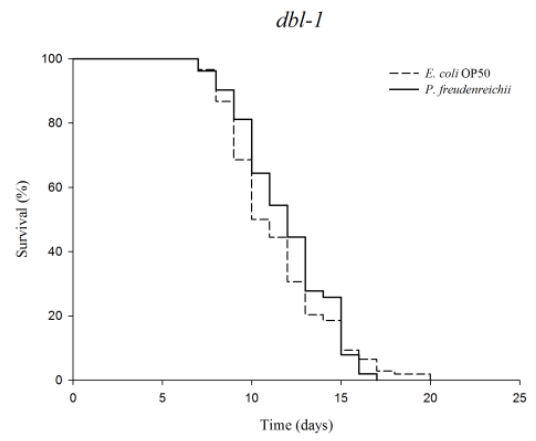**E**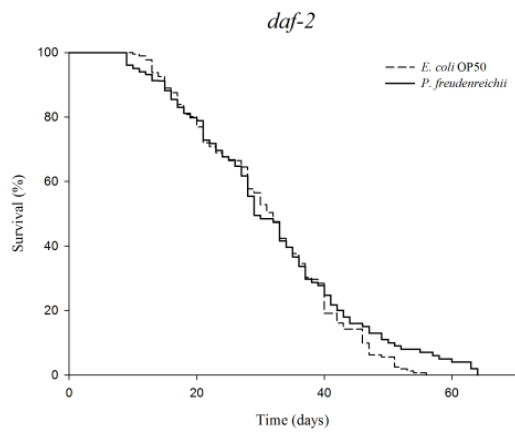**F**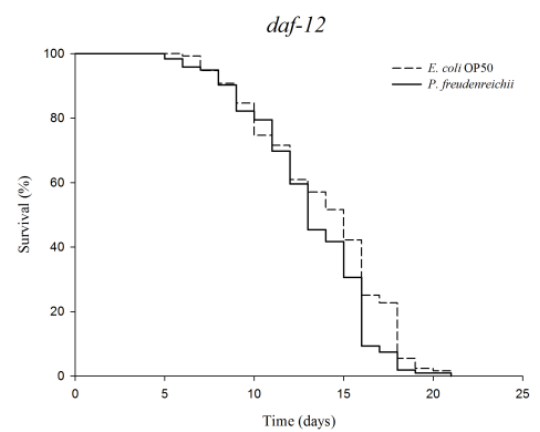

G

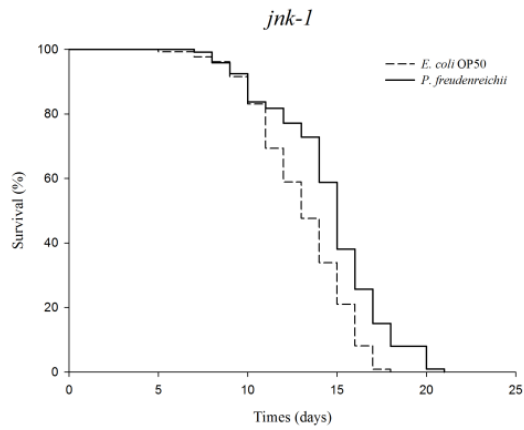

H

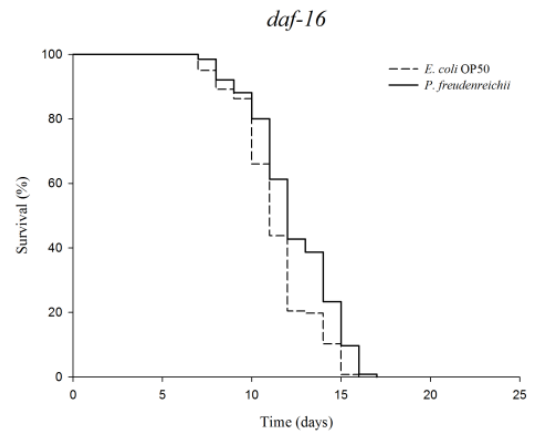

I

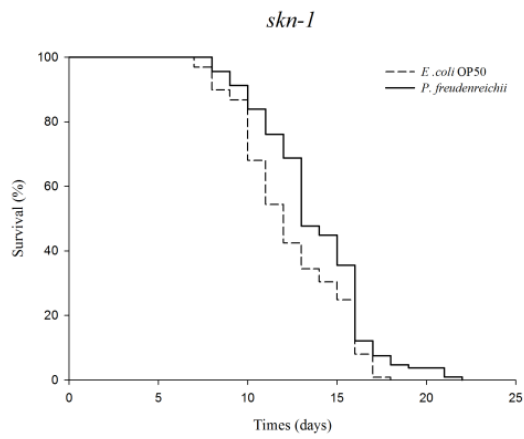

J

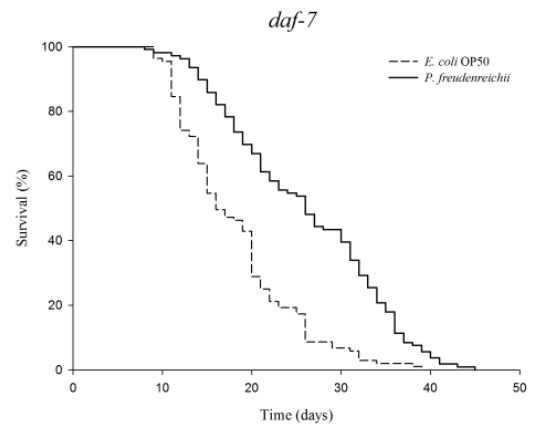

**Figure S1. Effect of *P. freudenreichii* on the lifespan of *C. elegans* loss-of-function mutants.** *p*-values were calculated using the log-rank test. Data were compared with *E. coli* OP50; \*\*  $p < 0.01$ , \*\*\*  $p < 0.001$ .

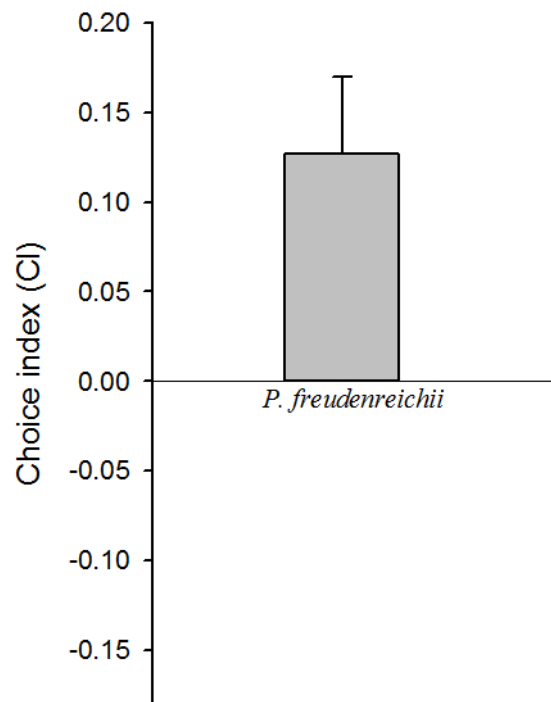

**Figure S2. Binary choice assay between *P. freudenreichii* and *E. coli* OP50.** The food choice index of *P. freudenreichii* compared with *E. coli* OP50.

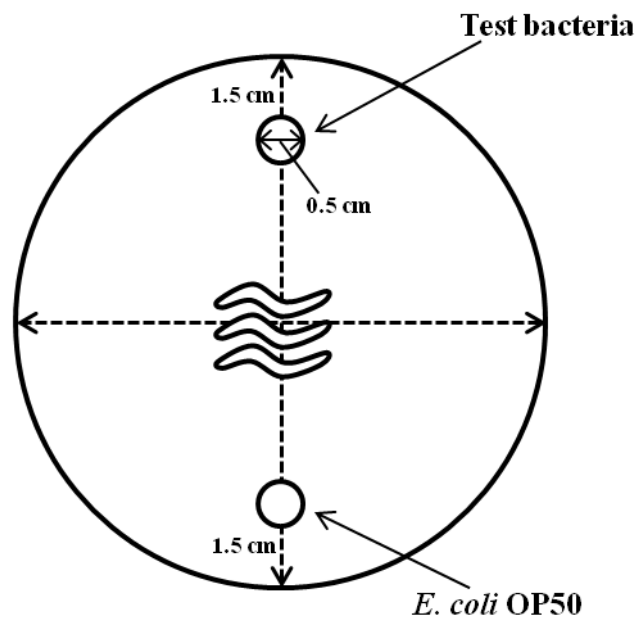

**Figure S3. Schematic representation of plates used for the binary choice assay.** Bacterial food was seeded at the same distance from the sides of the plates with a diameter of 0.5 cm, and nematodes (30 worms) were put on the centre of the plates.
